# Supplementary material for: Faster-X Effects in Two Drosophila Lineages
Source: PubMed Central journal article supplement — Genome Biol Evol. 2014 Oct 15;6(10):2968–82. doi: 10.1093/gbe/evu229 (PMC4224355; doi:10.1093/gbe/evu229), 2014-10-15
Supplement: supp_evu229_Supplement.pdf [file supp_evu229_Supplement.pdf]

### Supplementary Text: Calculating the maximal contribution of ancestral polymorphism to the faster X effect seen in *D. pseudoobscura* - *D. persimilis*

First, we find a rough correction for the between species divergence for within-species diversity by reducing the divergence values according to the mean diversity levels. For the *D. pseudoobscura* - *D. persimilis* divergence (abbreviated to *pse* - *per*), the mean  $K_A$  for the AA, XX, and XA genes are 0.0080, 0.012 and 0.014, respectively (for consistency with the polymorphism data below, we use means rather than medians). The corresponding mean  $K_S$  values are 0.038, 0.042 and 0.051. To estimate the contribution of polymorphism to the *pse* values, we can combine the polymorphism data from the current study with that of Haddrill *et al.* (2010), giving mean  $\pi_S$  values of 0.0221 and 0.0165 for AA and XX synonymous sites. The contribution of polymorphism from *D. persimilis* is probably lower than this: from (Machado *et al.* 2002), we find that the autosomal silent diversity in *D. persimilis* averages about 0.648 times that for *D. pseudoobscura* (although these values come from only 9 autosomal introns, the genomic data of (McGaugh and Noor 2012) for XL and chromosome 2 also support a substantially reduced level of diversity in *D. persimilis* compared with *D. pseudoobscura*). Using the estimate of 0.648 for the relative diversity level in *per*, the correction for the within-species diversity contribution to  $K_S$  is  $0.5 \times (1 + 0.648) = 0.824$  times the *pse* diversity value, *i.e.* 0.0186 for AA and 0.0147 for XX and XA combined (hereafter X). Averaging the  $K_S$  values for XX and AX, we obtain corrected  $K_S$  values of 0.0194 and 0.0318 for A and X, respectively.

The ratio of the corrected value of  $K_S$  to  $\pi_S$  provides an estimate of the time separating the species in units of  $2N_e$  generations (as net divergence is an estimate of  $2u \times$  the speciation time, and  $\pi_S$  of  $4N_e u$ ). Using mean  $\pi_S$  values for *pse*, this is about 0.88 for A and 1.80 for X, with the higher value for X-linked loci due to scaling by its lower  $N_e$ . These values of the divergence time are shorter than the average time to neutral fixation ( $4N_e$  generations), and well within the range where a high fraction of neutral fixations involve ancestral polymorphisms. For example, a divergence time of 1 yields around 98% of fixations within a single lineage are due to such events; for a value of 2, it is 80% (Charlesworth *et al.* 2005, equations 14 and 15).

Using this estimate of the divergence time, we can now ask whether the higher  $K_A$  values for the X-linked vs. autosomal loci can be explained solely by genetic drift fixing ancestral polymorphisms. The expected divergence between two independently evolving lineages resulting from fixation of ancestral polymorphism is simply equal to the ancestral pairwise diversity,  $\pi$ -anc, for neutral mutations, and lower for slightly deleterious mutations (Charlesworth *et al.* 2005). The upper limit to the expected contribution to the  $K_A$  values from ancestral polymorphisms for the X-linked loci is thus provided by the relevant  $\pi_A$  values. We can take the *pse* values as a probable overestimate of these, since *pse* shows signs of a recent population expansion (Machado *et al.* 2002). Unfortunately, the results for the slowly-evolving genes obtained by Haddrill *et al.* (Haddrill *et al.* 2010), and for the fast-evolving genes in Table 2, are rather different: a mean 0.00066 for slowly-evolving XL genes, and a mean of 0.00136 for fast-evolving XR genes, respectively. However, if we are again conservative and use the higher value, we obtain a maximum contribution of ancestral polymorphism to  $K_A$  of 0.00136; this is only about 10% of the estimate for  $K_A$  for the X-linked loci combined. It therefore seems impossible to account for the high X values of  $K_A$  by fixations of ancestral polymorphisms. The magnitude of this discrepancy is so large that it has a very low probability of arising by chance— even ignoring the contribution of ancestral polymorphism to  $K_S$ , the adjusted  $K_A$  values still result in significantly higher  $K_A/K_S$  for X-linked loci (mean adjusted  $K_A$  to unadjusted  $K_S$  values for X-linked loci is 0.168, autosomal is 0.121; Mann-Whitney U test,  $p = 2e-13$ ).

## References

- Haddrill PR, Loewe L, Charlesworth B. 2010. Estimating the parameters of selection on nonsynonymous mutations in *Drosophila pseudoobscura* and *D. miranda*. *Genetics*. 185:1381-1396.
- Machado CA, Kliman RM, Markert JA, Hey J. 2002. Inferring the history of speciation from multilocus DNA sequence data: the case of *Drosophila pseudoobscura* and close relatives. *Molecular biology and evolution*. 19:472-488.
- McGaugh SE, Noor MAF. 2012. Genomic impacts of chromosomal inversions in parapatric *Drosophila* species. *Philosophical Transactions of the Royal Society B: Biological Sciences*. 367:422-429.
- Charlesworth B, Bartolomé C, Noël V. 2005. Estimating the incidence of ancestral polymorphisms. *Genet Res*. 86:149-157.

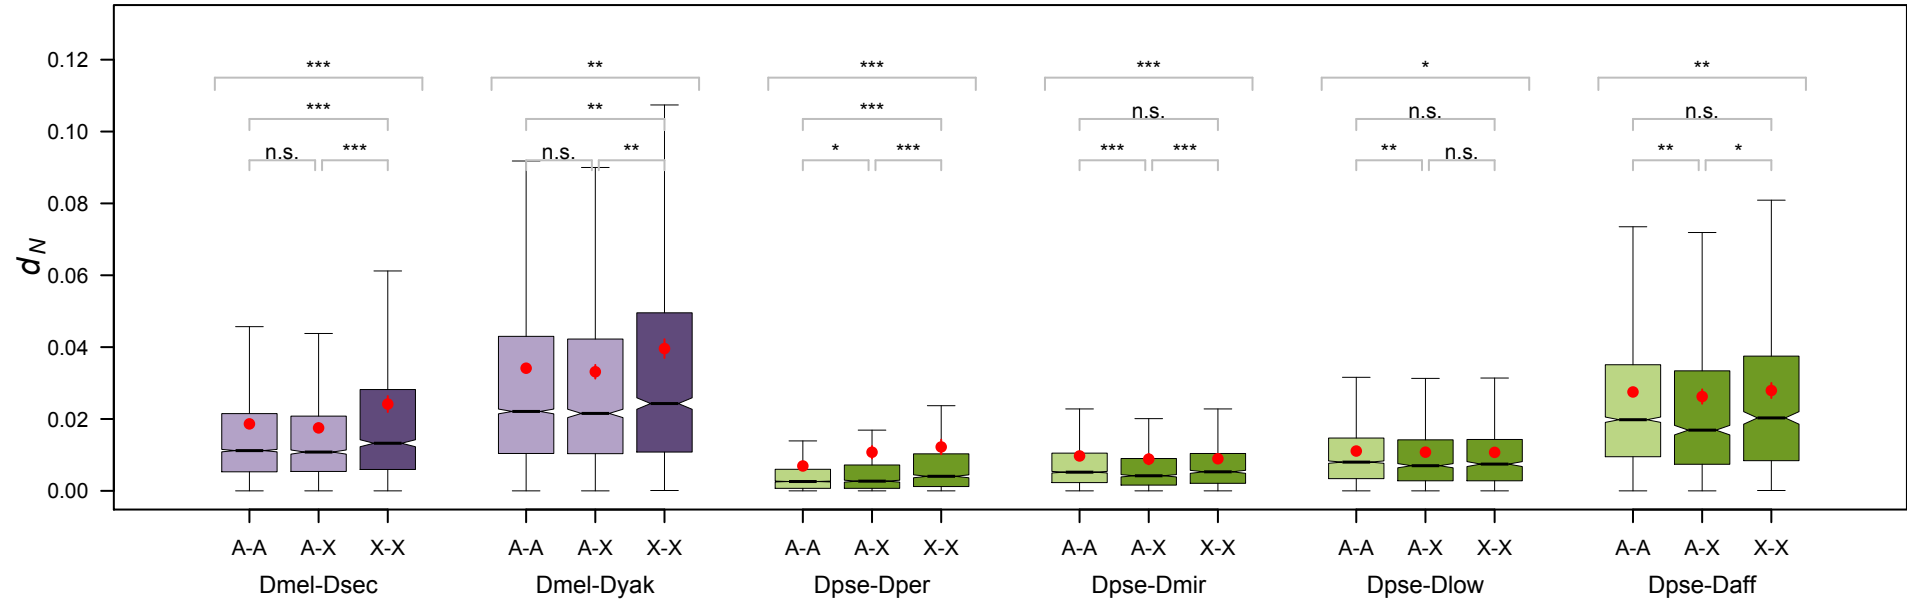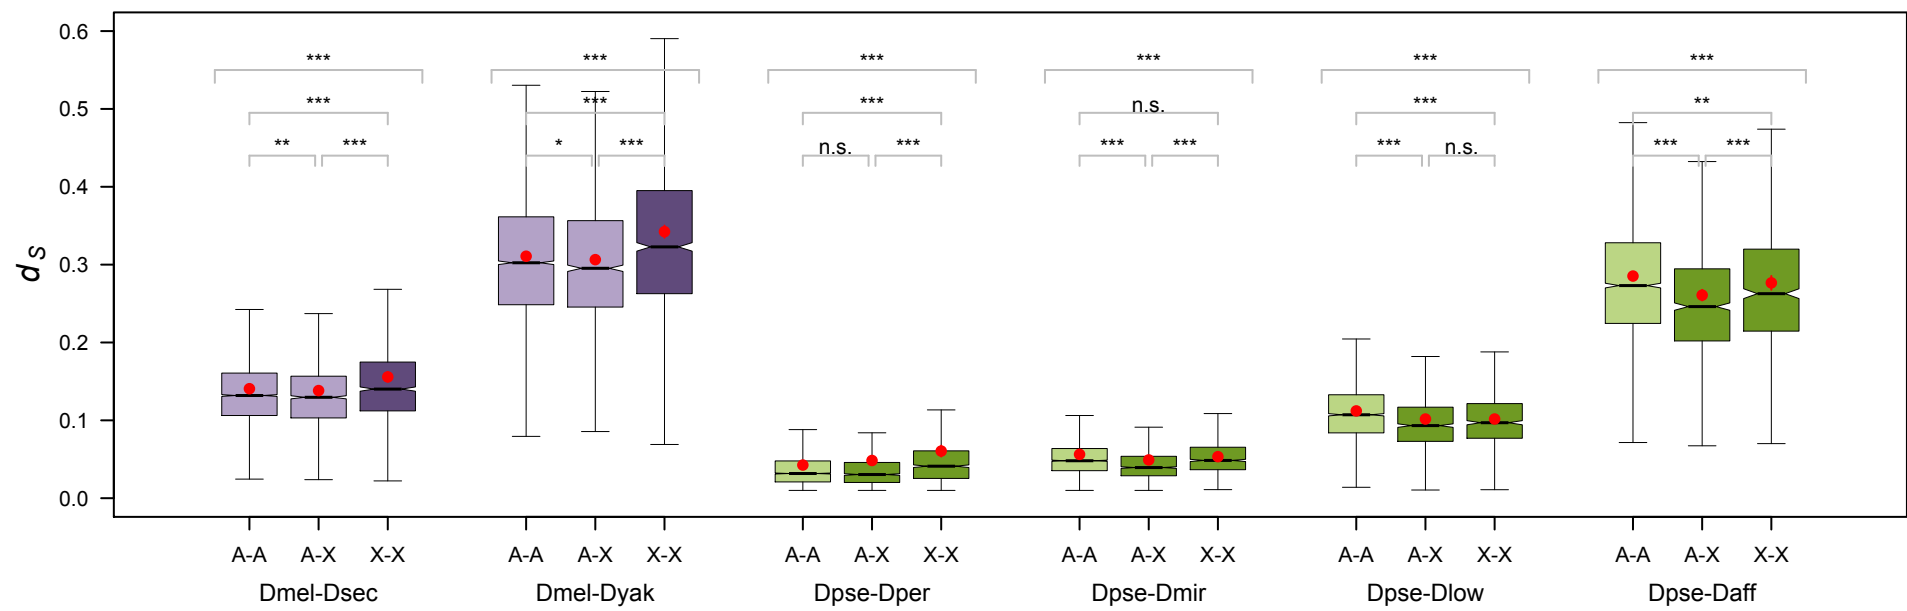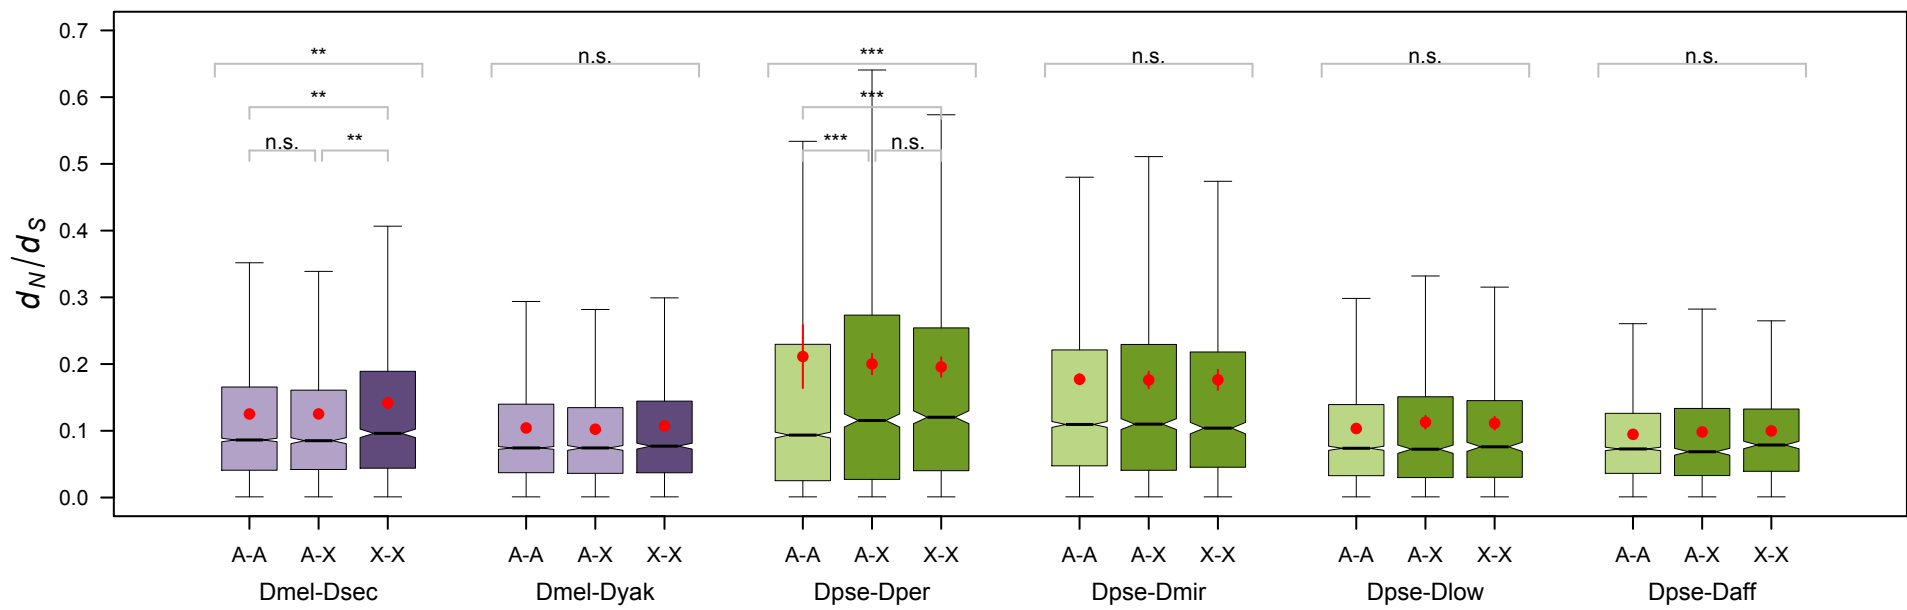

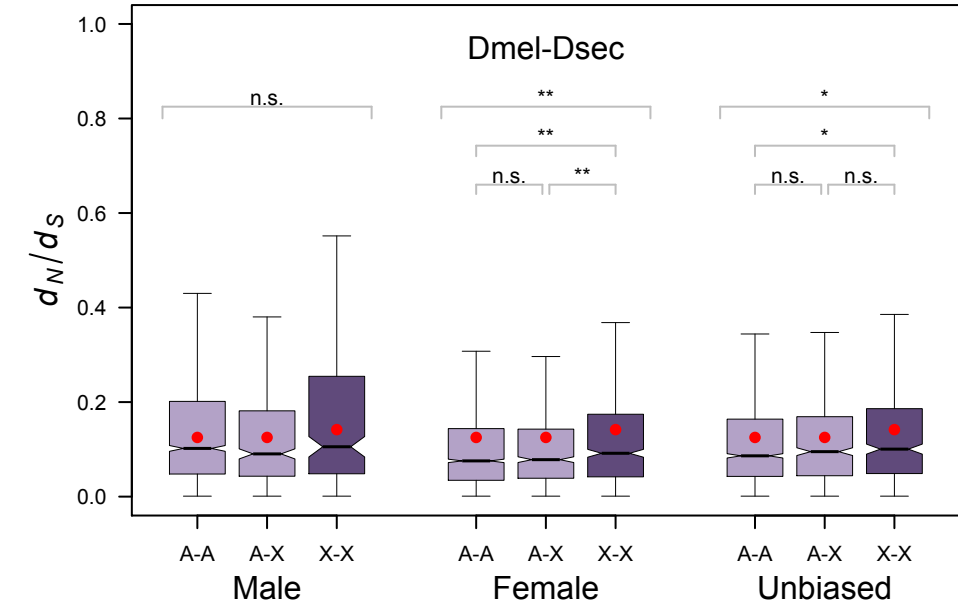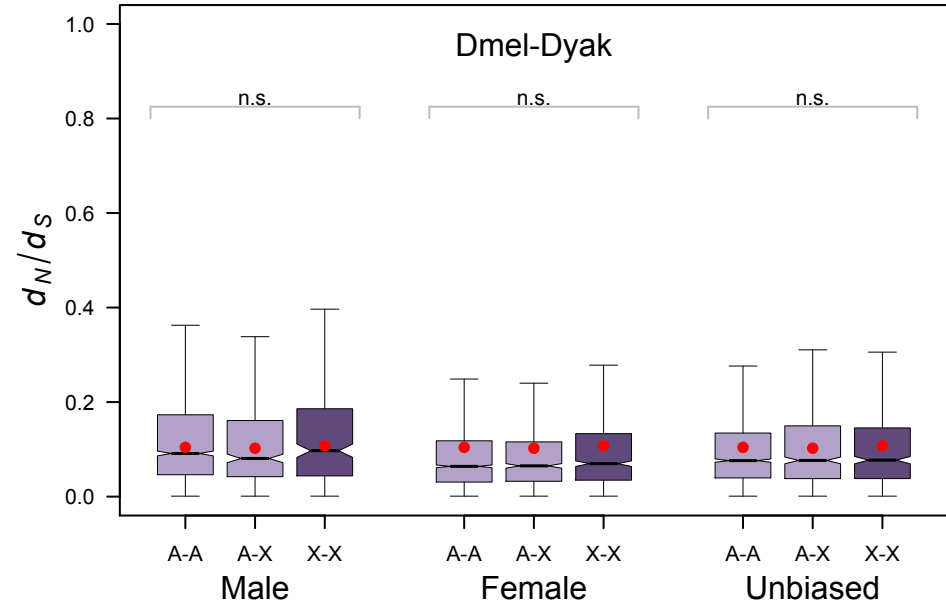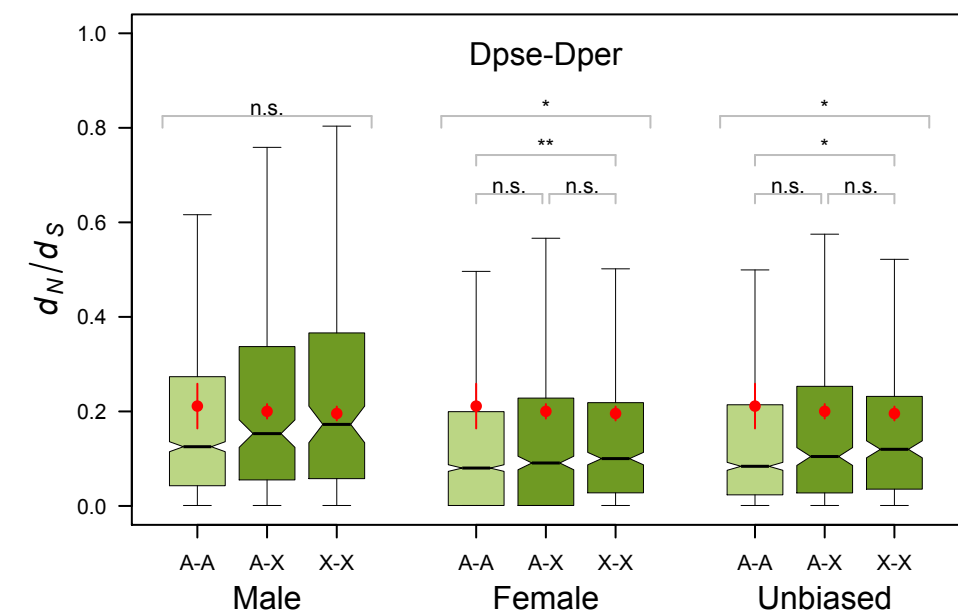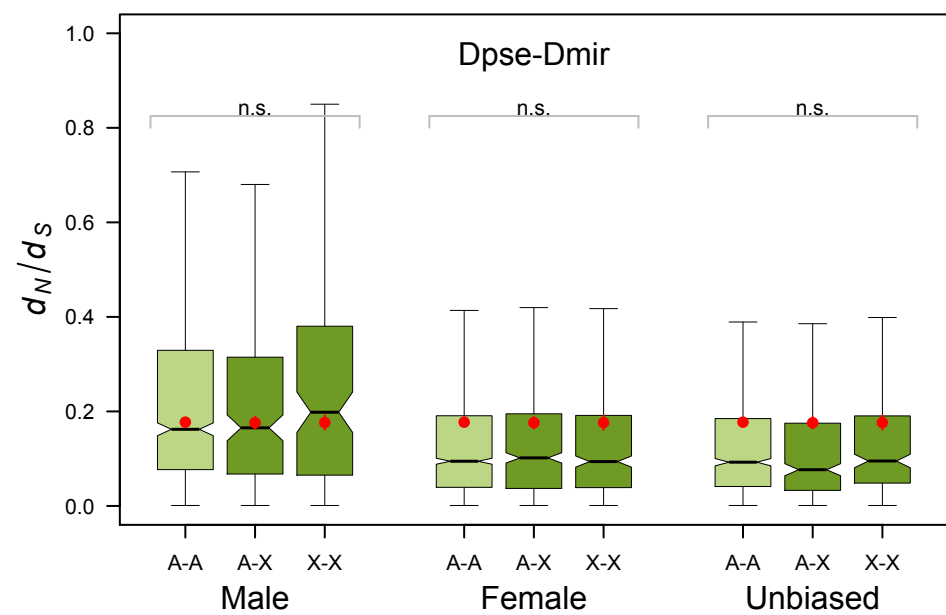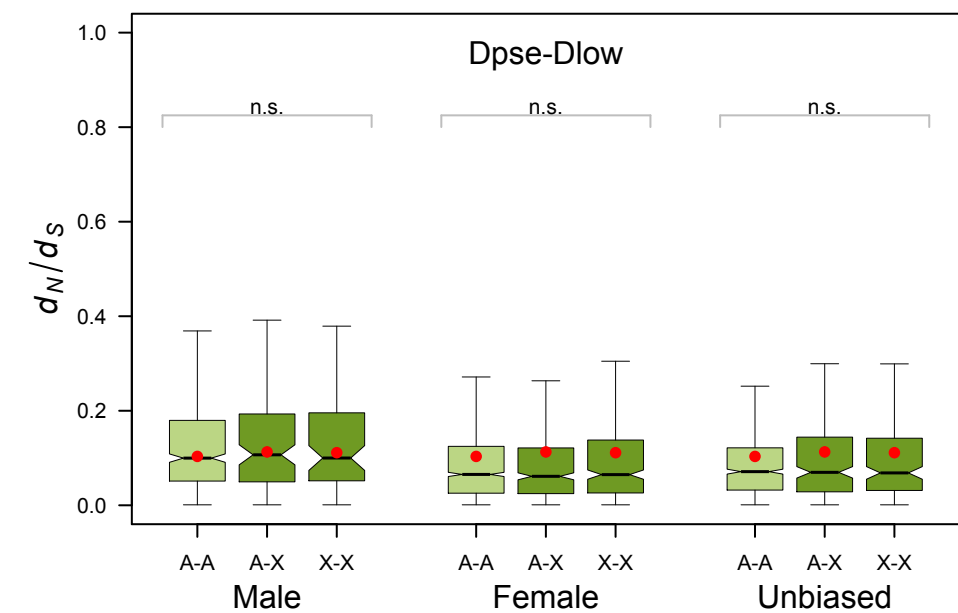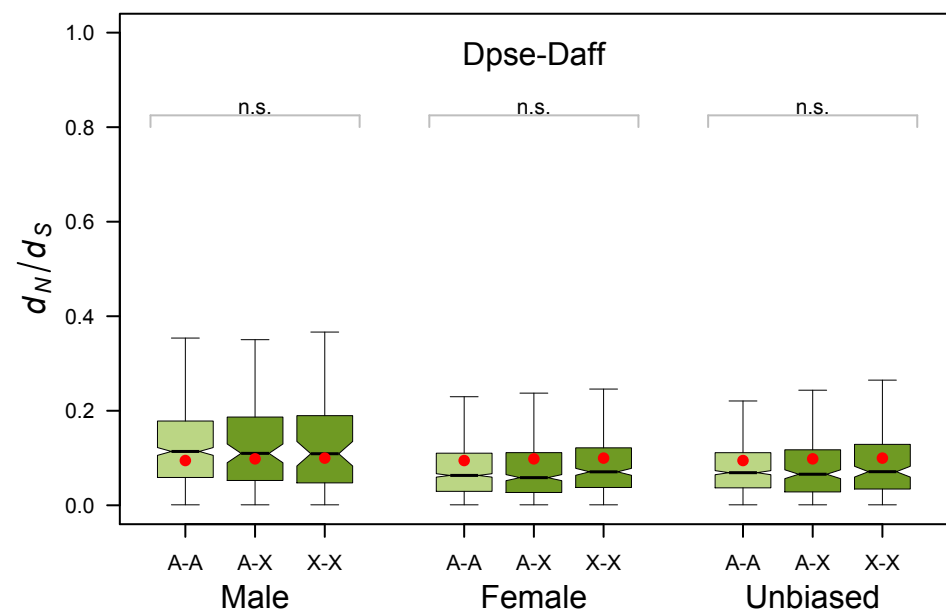

**Supplementary Table S1.** X-autosome comparison of rates of evolution, using pairwise Ka, Ks, and Ka/Ks rates as calculated by Gestimator. Medians and 95% confidence intervals are given for each species pair. Significance from Kruskal-Wallis and Mann-Whitney U tests is indicated by \*\*\* P < 0.001; \*\* P < 0.01; \* P < 0.05; '-' indicates that the Kruskal-Wallis test was not significant and Mann-Whitney U tests were thus not performed. X-autosome comparisons are highlighted in gray.

|                  |                  | A-A                         | X-X                         | A-X                         | Kruskal-Wallis tests        | Mann-Whitney U tests |             |             |             |
|------------------|------------------|-----------------------------|-----------------------------|-----------------------------|-----------------------------|----------------------|-------------|-------------|-------------|
|                  |                  |                             |                             |                             |                             | A-A vs. X-X          | A-X vs. X-X | A-X vs. A-A |             |
| All genes        | <i>Dmel-Dsec</i> | N                           | 5800                        | 1318                        | 1826                        |                      |             |             |             |
|                  |                  | Ka                          | 0.01166 (0.01126 - 0.01202) | 0.01365 (0.01286 - 0.01474) | 0.01102 (0.01044 - 0.01179) | 6.77e-09***          | 3.78e-08*** | 3.78e-08*** | 0.2827      |
|                  |                  | Ks                          | 0.11520 (0.11410 - 0.11630) | 0.11335 (0.11100 - 0.11620) | 0.11405 (0.11230 - 0.11600) | 0.5117               | --          | --          | --          |
|                  |                  | Ka/Ks                       | 0.10295 (0.10030 - 0.10595) | 0.12175 (0.11520 - 0.13280) | 0.10045 (0.09420 - 0.10640) | 6.96e-10***          | 2.24e-09*** | 1.50e-08*** | 0.4607      |
|                  | <i>Dmel-Dyak</i> | N                           | 6081                        | 1487                        | 1900                        |                      |             |             |             |
|                  |                  | Ka                          | 0.02315 (0.02230 - 0.02378) | 0.02571 (0.02380 - 0.02735) | 0.02181 (0.02049 - 0.02332) | 0.0002***            | 0.0005***   | 0.0003***   | 0.2269      |
|                  |                  | Ks                          | 0.25950 (0.25750 - 0.26170) | 0.25330 (0.25020 - 0.25780) | 0.25490 (0.25105 - 0.25880) | 0.3514               | --          | --          | --          |
|                  |                  | Ka/Ks                       | 0.09283 (0.08971 - 0.09471) | 0.10650 (0.10070 - 0.11110) | 0.08883 (0.08514 - 0.09465) | 5.01e-06***          | 1.22e-05*** | 1.22e-05*** | 0.2657      |
|                  | <i>Dpse-Dper</i> | N                           | 4791                        | 1127                        | 1368                        |                      |             |             |             |
|                  |                  | Ka                          | 0.00300 (0.00287 - 0.00313) | 0.00488 (0.00432 - 0.00531) | 0.00312 (0.00290 - 0.00352) | 2.89e-19***          | 4.48e-20*** | 2.34e-07*** | 0.0087**    |
|                  |                  | Ks                          | 0.02815 (0.02767 - 0.02867) | 0.03425 (0.03310 - 0.03568) | 0.02585 (0.02509 - 0.02680) | 8.79e-20***          | 1.63e-15*** | 1.42e-17*** | 0.0006***   |
|                  |                  | Ka/Ks                       | 0.10830 (0.10380 - 0.11320) | 0.15130 (0.13890 - 0.16640) | 0.13080 (0.12395 - 0.14205) | 1.11e-14***          | 8.49e-13*** | 0.0344*     | 2.45e-06*** |
|                  | <i>Dpse-Dmir</i> | N                           | 4756                        | 1300                        | 1616                        |                      |             |             |             |
|                  |                  | Ka                          | 0.00554 (0.00535 - 0.00573) | 0.00573 (0.00538 - 0.00626) | 0.00451 (0.00425 - 0.00484) | 6.50e-09***          | 0.5891      | 1.13e-06*** | 1.72e-08*** |
|                  |                  | Ks                          | 0.04219 (0.04161 - 0.04272) | 0.04016 (0.03910 - 0.04113) | 0.03402 (0.03310 - 0.03478) | 4.57e-52***          | 0.0021**    | 2.01e-21*** | 2.44e-52*** |
|                  |                  | Ka/Ks                       | 0.13645 (0.13185 - 0.14180) | 0.14515 (0.13255 - 0.15415) | 0.13575 (0.12830 - 0.14480) | 0.2987               | --          | --          | --          |
|                  | <i>Dpse-Dlow</i> | N                           | 3012                        | 703                         | 969                         |                      |             |             |             |
|                  |                  | Ka                          | 0.00830 (0.00789 - 0.00868) | 0.00770 (0.00723 - 0.00857) | 0.00726 (0.00673 - 0.00772) | 0.0209*              | 0.3129      | 0.3129      | 0.0197*     |
| Ks               |                  | 0.09119 (0.09018 - 0.09237) | 0.07855 (0.07616 - 0.08100) | 0.07840 (0.07680 - 0.08065) | 2.17e-43***                 | 4.88e-25***          | 0.9791      | 8.49e-30*** |             |
| Ka/Ks            |                  | 0.09048 (0.08688 - 0.09424) | 0.10300 (0.09239 - 0.11630) | 0.09247 (0.08566 - 0.09928) | 0.1046                      | --                   | --          | --          |             |
| <i>Dpse-Daff</i> | N                | 3022                        | 706                         | 973                         |                             |                      |             |             |             |
|                  | Ka               | 0.02051 (0.01969 - 0.02136) | 0.02129 (0.01964 - 0.02336) | 0.01790 (0.01661 - 0.01903) | 0.0044**                    | 0.7436               | 0.0197*     | 0.0045**    |             |
|                  | Ks               | 0.23035 (0.22795 - 0.23310) | 0.20820 (0.20400 - 0.21536) | 0.20500 (0.20020 - 0.20910) | 3.48e-30***                 | 8.64e-13***          | 0.0545      | 3.54e-25*** |             |
|                  | Ka/Ks            | 0.09162 (0.08799 - 0.09539) | 0.10480 (0.09593 - 0.11330) | 0.09110 (0.08366 - 0.09730) | 0.0393*                     | 0.0386*              | 0.0581      | 0.8062      |             |
| Common genes     | <i>Dmel-Dsec</i> | N                           | 1960                        | 464                         | 623                         |                      |             |             |             |
|                  |                  | Ka                          | 0.00956 (0.00912 - 0.01005) | 0.01120 (0.01007 - 0.01283) | 0.01033 (0.00968 - 0.01137) | 0.0002***            | 0.0002***   | 0.0637      | 0.0524      |
|                  |                  | Ks                          | 0.11570 (0.11370 - 0.11735) | 0.11030 (0.10690 - 0.11320) | 0.11560 (0.11290 - 0.11880) | 0.054                | --          | --          | --          |
|                  |                  | Ka/Ks                       | 0.08430 (0.08030 - 0.08877) | 0.10430 (0.09274 - 0.11290) | 0.09123 (0.08435 - 0.09945) | 1.06e-05***          | 1.31e-05*** | 0.0263*     | 0.0263*     |
|                  | <i>Dmel-Dyak</i> | N                           | 1960                        | 464                         | 623                         |                      |             |             |             |
|                  |                  | Ka                          | 0.01903 (0.01825 - 0.02018) | 0.02243 (0.01978 - 0.02463) | 0.01940 (0.01729 - 0.02169) | 0.0153*              | 0.0129*     | 0.1303      | 0.3237      |
|                  |                  | Ks                          | 0.25860 (0.25495 - 0.26240) | 0.25170 (0.24520 - 0.25830) | 0.25550 (0.25080 - 0.26182) | 0.3832               | --          | --          | --          |
|                  |                  | Ka/Ks                       | 0.07858 (0.07500 - 0.08222) | 0.09136 (0.08108 - 0.10045) | 0.07881 (0.07039 - 0.08658) | 0.0010***            | 0.0006***   | 0.0273*     | 0.2916      |
|                  | <i>Dpse-Dper</i> | N                           | 1960                        | 464                         | 623                         |                      |             |             |             |
|                  |                  | Ka                          | 0.00209 (0.00195 - 0.00225) | 0.00335 (0.00273 - 0.00409) | 0.00244 (0.00205 - 0.00270) | 5.52e-09***          | 5.35e-09*** | 0.0060**    | 0.0060**    |
|                  |                  | Ks                          | 0.02699 (0.02624 - 0.02770) | 0.03114 (0.02803 - 0.03307) | 0.02507 (0.02350 - 0.02620) | 9.69e-06***          | 0.0002***   | 1.61e-05*** | 0.0365*     |
|                  |                  | Ka/Ks                       | 0.07930 (0.07317 - 0.08530) | 0.11240 (0.09617 - 0.12721) | 0.10150 (0.08841 - 0.11610) | 5.94e-08***          | 2.80e-06*** | 0.2902      | 8.41e-05*** |
|                  | <i>Dpse-Dmir</i> | N                           | 1960                        | 464                         | 623                         |                      |             |             |             |
|                  |                  | Ka                          | 0.00451 (0.00427 - 0.00476) | 0.00438 (0.00387 - 0.00509) | 0.00381 (0.00333 - 0.00410) | 0.0095**             | 0.7606      | 0.0232*     | 0.0111*     |
|                  |                  | Ks                          | 0.04276 (0.04198 - 0.04364) | 0.03977 (0.03817 - 0.04125) | 0.03490 (0.03383 - 0.03619) | 1.31e-22***          | 0.0077**    | 1.14e-07*** | 4.44e-23*** |
|                  |                  | Ka/Ks                       | 0.10585 (0.10030 - 0.11310) | 0.10885 (0.09747 - 0.12630) | 0.11110 (0.09884 - 0.12320) | 0.7181               | --          | --          | --          |
|                  | <i>Dpse-Dlow</i> | N                           | 1960                        | 464                         | 623                         |                      |             |             |             |
|                  |                  | Ka                          | 0.00902 (0.00842 - 0.00935) | 0.00804 (0.00730 - 0.00965) | 0.00778 (0.00724 - 0.00882) | 0.2988               | --          | --          | --          |
| Ks               |                  | 0.09436 (0.09269 - 0.09607) | 0.08013 (0.07782 - 0.08274) | 0.08267 (0.08073 - 0.08448) | 1.94e-32***                 | 2.26e-22***          | 0.0974      | 4.99e-19*** |             |
| Ka/Ks            |                  | 0.09241 (0.08718 - 0.09615) | 0.10255 (0.08970 - 0.11740) | 0.09836 (0.09126 - 0.10790) | 0.1416                      | --                   | --          | --          |             |
| <i>Dpse-Daff</i> | N                | 1960                        | 464                         | 623                         |                             |                      |             |             |             |
|                  | Ka               | 0.02187 (0.02084 - 0.02314) | 0.02218 (0.02000 - 0.02520) | 0.01973 (0.01849 - 0.02199) | 0.2291                      | --                   | --          | --          |             |
|                  | Ks               | 0.23710 (0.23469 - 0.24000) | 0.21035 (0.20610 - 0.21830) | 0.21380 (0.20900 - 0.21870) | 1.14e-23***                 | 1.02e-14***          | 0.6401      | 6.02e-16*** |             |
|                  | Ka/Ks            | 0.09390 (0.08895 - 0.09812) | 0.10915 (0.09914 - 0.12075) | 0.09904 (0.08884 - 0.10680) | 0.0537                      | --                   | --          | --          |             |

**Supplementary Table S2.** X-autosome comparison of rates of evolution, using pairwise dN, dS and dN/dS rates as calculated by PAML. Medians and 95% confidence intervals are given for each species pair. Significance from Kruskal-Wallis and Mann-Whitney U tests is indicated by \*\*\* P < 0.001; \*\* P < 0.01; \* P < 0.05; '-' indicates that the Kruskal-Wallis test was not significant and Mann-Whitney U tests were thus not performed. X-autosome comparisons are highlighted in gray.

|                  |                                   | A-A                               | X-X                         | A-X                         | Kruskal-Wallis tests | Mann-Whitney U tests |             |             |
|------------------|-----------------------------------|-----------------------------------|-----------------------------|-----------------------------|----------------------|----------------------|-------------|-------------|
|                  |                                   |                                   |                             |                             |                      | A-A vs. X-X          | A-X vs. X-X | A-X vs. A-A |
| All_genes        | <i>Dmel-Dsec</i>                  | N 5710                            | 1300                        | 1778                        |                      |                      |             |             |
|                  |                                   | dN 0.01120 (0.01090 - 0.01160)    | 0.01325 (0.01220 - 0.01420) | 0.01080 (0.01030 - 0.01140) | 9.08e-08***          | 3.22e-07***          | 3.22e-07*** | 0.2905      |
|                  |                                   | dS 0.13190 (0.13055 - 0.13340)    | 0.14015 (0.13750 - 0.14230) | 0.12960 (0.12740 - 0.13230) | 9.12e-13***          | 4.54e-10***          | 2.36e-12*** | 0.0088**    |
|                  |                                   | dN/dS 0.08625 (0.08410 - 0.08890) | 0.09615 (0.08990 - 0.10275) | 0.08515 (0.08130 - 0.09135) | 0.0041**             | 0.0042**             | 0.0067**    | 0.8613      |
|                  | <i>Dmel-Dyak</i>                  | N 5977                            | 1463                        | 1848                        |                      |                      |             |             |
|                  |                                   | dN 0.02210 (0.02140 - 0.02300)    | 0.02430 (0.02250 - 0.02590) | 0.02155 (0.02000 - 0.02265) | 0.0038**             | 0.0064**             | 0.0042**    | 0.2763      |
|                  |                                   | dS 0.30240 (0.29940 - 0.30480)    | 0.32280 (0.31590 - 0.33050) | 0.29530 (0.29005 - 0.29920) | 1.43e-17***          | 9.00e-15***          | 1.06e-15*** | 0.0138*     |
|                  |                                   | dN/dS 0.07430 (0.07190 - 0.07640) | 0.07700 (0.07210 - 0.08170) | 0.07430 (0.06935 - 0.07750) | 0.5668               | --                   | --          | --          |
|                  | <i>Dpse-Dper</i>                  | N 5438                            | 1233                        | 1552                        |                      |                      |             |             |
|                  |                                   | dN 0.00260 (0.00250 - 0.00270)    | 0.00405 (0.00370 - 0.00460) | 0.00270 (0.00250 - 0.00290) | 5.15e-20***          | 5.85e-21***          | 6.15e-09*** | 0.0342*     |
|                  |                                   | dS 0.03170 (0.03110 - 0.03250)    | 0.04110 (0.03930 - 0.04265) | 0.03040 (0.02890 - 0.03130) | 8.84e-27***          | 2.79e-25***          | 4.52e-20*** | 0.1802      |
|                  |                                   | dN/dS 0.09355 (0.08980 - 0.09780) | 0.12030 (0.10940 - 0.13380) | 0.11545 (0.10390 - 0.12550) | 8.04e-07***          | 9.44e-06***          | 0.3164      | 0.0008***   |
|                  | <i>Dpse-Dmir</i>                  | N 3831                            | 999                         | 1336                        |                      |                      |             |             |
|                  |                                   | dN 0.00520 (0.00500 - 0.00530)    | 0.00530 (0.00470 - 0.00570) | 0.00420 (0.00390 - 0.00440) | 4.43e-07***          | 0.6884               | 0.0004***   | 2.61e-07*** |
|                  |                                   | dS 0.04810 (0.04710 - 0.04880)    | 0.04850 (0.04640 - 0.05040) | 0.03935 (0.03825 - 0.04085) | 2.09e-35***          | 0.2362               | 6.41e-24*** | 1.82e-32*** |
|                  | dN/dS 0.10950 (0.10470 - 0.11460) | 0.10400 (0.09509 - 0.11490)       | 0.10995 (0.10048 - 0.11740) | 0.6006                      | --                   | --                   | --          |             |
| <i>Dpse-Dlow</i> | N 2968                            | 694                               | 949                         |                             |                      |                      |             |             |
|                  | dN 0.00800 (0.00750 - 0.00830)    | 0.00745 (0.00690 - 0.00810)       | 0.00700 (0.00650 - 0.00750) | 0.0209*                     | 0.2716               | 0.3848               | 0.0229*     |             |
|                  | dS 0.10715 (0.10580 - 0.10875)    | 0.09695 (0.09460 - 0.10025)       | 0.09325 (0.09160 - 0.09590) | 1.05e-24***                 | 2.26e-10***          | 0.0735               | 6.04e-21*** |             |
|                  | dN/dS 0.07380 (0.07045 - 0.07655) | 0.07600 (0.06785 - 0.08615)       | 0.07240 (0.06620 - 0.07980) | 0.7701                      | --                   | --                   | --          |             |
| <i>Dpse-Daff</i> | N 2969                            | 694                               | 949                         |                             |                      |                      |             |             |
|                  | dN 0.01980 (0.01880 - 0.02040)    | 0.02030 (0.01870 - 0.02215)       | 0.01690 (0.01590 - 0.01850) | 0.0042**                    | 0.7361               | 0.0187*              | 0.0042**    |             |
|                  | dS 0.27310 (0.26999 - 0.27630)    | 0.26270 (0.25510 - 0.26926)       | 0.24610 (0.24060 - 0.25121) | 4.14e-17***                 | 0.0056**             | 9.11e-05***          | 1.48e-17*** |             |
|                  | dN/dS 0.07280 (0.06960 - 0.07630) | 0.07870 (0.07120 - 0.08440)       | 0.06860 (0.06240 - 0.07440) | 0.3901                      | --                   | --                   | --          |             |
| Common_genes     | <i>Dmel-Dsec</i>                  | N 1714                            | 390                         | 560                         |                      |                      |             |             |
|                  |                                   | dN 0.00910 (0.00850 - 0.00990)    | 0.01020 (0.00920 - 0.01180) | 0.00980 (0.00890 - 0.01070) | 0.0351*              | 0.0393*              | 0.2275      | 0.2275      |
|                  |                                   | dS 0.13650 (0.13440 - 0.13915)    | 0.14100 (0.13755 - 0.14650) | 0.13390 (0.12870 - 0.13726) | 0.0023**             | 6.88E-02             | 0.0025**    | 0.0161*     |
|                  |                                   | dN/dS 0.06705 (0.06310 - 0.07160) | 0.07390 (0.06430 - 0.07915) | 0.07685 (0.06810 - 0.08150) | 0.0771               | --                   | --          | --          |
|                  | <i>Dmel-Dyak</i>                  | N 1714                            | 390                         | 560                         |                      |                      |             |             |
|                  |                                   | dN 0.01820 (0.01735 - 0.01900)    | 0.01885 (0.01670 - 0.02200) | 0.01840 (0.01655 - 0.02080) | 0.4887               | --                   | --          | --          |
|                  |                                   | dS 0.30860 (0.30455 - 0.31190)    | 0.33015 (0.31850 - 0.34100) | 0.29970 (0.29195 - 0.30890) | 7.29e-06***          | 4.41e-05***          | 1.67e-05*** | 0.0853      |
|                  |                                   | dN/dS 0.06000 (0.05720 - 0.06360) | 0.05915 (0.05105 - 0.06630) | 0.06185 (0.05765 - 0.06721) | 0.4025               | --                   | --          | --          |
|                  | <i>Dpse-Dper</i>                  | N 1714                            | 390                         | 560                         |                      |                      |             |             |
|                  |                                   | dN 0.00200 (0.00180 - 0.00210)    | 0.00260 (0.00210 - 0.00310) | 0.00220 (0.00190 - 0.00250) | 0.0001***            | 0.0001***            | 0.0884      | 0.0418*     |
|                  |                                   | dS 0.03015 (0.02935 - 0.03120)    | 0.03690 (0.03390 - 0.03940) | 0.02965 (0.02765 - 0.03125) | 4.06e-07***          | 8.08e-07***          | 2.83e-06*** | 0.4746      |
|                  |                                   | dN/dS 0.06530 (0.06050 - 0.07170) | 0.07625 (0.06590 - 0.08842) | 0.07910 (0.07014 - 0.09161) | 0.0028**             | 0.0374*              | 0.7277      | 0.0077**    |
|                  | <i>Dpse-Dmir</i>                  | N 1714                            | 390                         | 560                         |                      |                      |             |             |
|                  |                                   | dN 0.00420 (0.00400 - 0.00450)    | 0.00365 (0.00310 - 0.00430) | 0.00340 (0.00305 - 0.00385) | 0.0137*              | 0.2570               | 0.2570      | 0.0122*     |
|                  |                                   | dS 0.04865 (0.04750 - 0.05020)    | 0.04850 (0.04465 - 0.05100) | 0.04105 (0.03935 - 0.04210) | 1.71e-17***          | 0.9794               | 2.54e-10*** | 3.19e-17*** |
|                  | dN/dS 0.08440 (0.07835 - 0.09145) | 0.07715 (0.06730 - 0.08480)       | 0.08400 (0.07340 - 0.09736) | 0.4546                      | --                   | --                   | --          |             |
| <i>Dpse-Dlow</i> | N 1714                            | 390                               | 560                         |                             |                      |                      |             |             |
|                  | dN 0.00820 (0.00780 - 0.00870)    | 0.00710 (0.00610 - 0.00780)       | 0.00740 (0.00680 - 0.00835) | 0.0337*                     | 0.0276*              | 0.1738               | 0.4254      |             |
|                  | dS 0.11165 (0.10920 - 0.11350)    | 0.09760 (0.09465 - 0.10145)       | 0.09650 (0.09370 - 0.10010) | 2.55e-18***                 | 7.32e-10***          | 0.6729               | 4.72e-14*** |             |
|                  | dN/dS 0.07115 (0.06835 - 0.07540) | 0.06980 (0.06015 - 0.08090)       | 0.07530 (0.06800 - 0.08580) | 0.2607                      | --                   | --                   | --          |             |
| <i>Dpse-Daff</i> | N 1714                            | 390                               | 560                         |                             |                      |                      |             |             |
|                  | dN 0.02070 (0.01955 - 0.02220)    | 0.01970 (0.01650 - 0.02190)       | 0.01880 (0.01675 - 0.02070) | 0.2053                      | --                   | --                   | --          |             |
|                  | dS 0.28270 (0.27860 - 0.28760)    | 0.26640 (0.25909 - 0.27535)       | 0.25520 (0.24740 - 0.26270) | 8.07e-13***                 | 0.0002***            | 0.0662               | 4.23e-12*** |             |
|                  | dN/dS 0.07175 (0.06805 - 0.07640) | 0.07430 (0.06535 - 0.08140)       | 0.07420 (0.06310 - 0.08050) | 0.9303                      | --                   | --                   | --          |             |

Supplementary Table 3. Comparisons of Ka/Ks between X-linked and autosomal genes, divided by sex-biased expression.

|                     |                  | A-A                                                                | X-X                                | A-X                               | Kruskal-Wallis tests | Mann-Whitney U tests |             |             |
|---------------------|------------------|--------------------------------------------------------------------|------------------------------------|-----------------------------------|----------------------|----------------------|-------------|-------------|
|                     |                  |                                                                    |                                    |                                   |                      | A-A vs. X-X          | A-X vs. X-X | A-X vs. A-A |
| Male-biased genes   | <i>Dmel-Dsec</i> | <i>N</i> 1591<br><i>Ka/Ks</i> 0.1208<br><i>CI</i> (0.1143-0.1287)  | 431<br>0.1091<br>(0.0906-0.1236)   | 228<br>0.14155<br>(0.1165-0.1703) | 0.0068**             | 0.0245*              | 0.0065**    | 0.0903      |
|                     | <i>Dmel-Dyak</i> | <i>N</i> 1657<br><i>Ka/Ks</i> 0.113<br><i>CI</i> (0.1066-0.121)    | 446<br>0.10405<br>(0.0906-0.1184)  | 251<br>0.1357<br>(0.118-0.1515)   | 0.0060**             | 0.0403*              | 0.0060**    | 0.0499*     |
|                     | <i>Dpse-Dper</i> | <i>N</i> 1055<br><i>Ka/Ks</i> 0.1508<br><i>CI</i> (0.139-0.163)    | 213<br>0.1821<br>(0.1521-0.2081)   | 142<br>0.2242<br>(0.1675-0.2834)  | 0.0074**             | 0.0181*              | 0.2648      | 0.0946      |
|                     | <i>Dpse-Dmir</i> | <i>N</i> 1060<br><i>Ka/Ks</i> 0.21565<br><i>CI</i> (0.2023-0.2288) | 247<br>0.2149<br>(0.1966-0.2513)   | 173<br>0.2501<br>(0.2112-0.304)   | 0.5515               | --                   | --          | --          |
|                     | <i>Dpse-Dlow</i> | <i>N</i> 534<br><i>Ka/Ks</i> 0.13055<br><i>CI</i> (0.1185-0.1371)  | 118<br>0.14225<br>(0.114-0.18)     | 73<br>0.1487<br>(0.1091-0.1774)   | 0.5157               | --                   | --          | --          |
|                     | <i>Dpse-Daff</i> | <i>N</i> 535<br><i>Ka/Ks</i> 0.1378<br><i>CI</i> (0.1276-0.1549)   | 119<br>0.152<br>(0.1173-0.1854)    | 75<br>0.148<br>(0.1253-0.1878)    | 0.6617               | --                   | --          | --          |
| Female-biased genes | <i>Dmel-Dsec</i> | <i>N</i> 2295<br><i>Ka/Ks</i> 0.09248<br><i>CI</i> (0.0878-0.0967) | 751<br>0.0906<br>(0.0844-0.095)    | 646<br>0.11755<br>(0.1075-0.1255) | 3.14e-08***          | 6.68e-08***          | 7.79e-07*** | 0.7343      |
|                     | <i>Dmel-Dyak</i> | <i>N</i> 2404<br><i>Ka/Ks</i> 0.07911<br><i>CI</i> (0.0758-0.082)  | 773<br>0.07873<br>(0.0717-0.0851)  | 737<br>0.09791<br>(0.0916-0.1058) | 2.63e-07***          | 2.86e-07***          | 1.70e-05*** | 0.8728      |
|                     | <i>Dpse-Dper</i> | <i>N</i> 1706<br><i>Ka/Ks</i> 0.08904<br><i>CI</i> (0.0813-0.097)  | 538<br>0.10465<br>(0.0949-0.1203)  | 477<br>0.1191<br>(0.1057-0.1364)  | 1.17e-05***          | 1.47e-05***          | 0.1211      | 0.0198*     |
|                     | <i>Dpse-Dmir</i> | <i>N</i> 1747<br><i>Ka/Ks</i> 0.1129<br><i>CI</i> (0.1071-0.1214)  | 621<br>0.1256<br>(0.1118-0.1397)   | 516<br>0.1252<br>(0.109-0.1405)   | 0.1517               | --                   | --          | --          |
|                     | <i>Dpse-Dlow</i> | <i>N</i> 1265<br><i>Ka/Ks</i> 0.07623<br><i>CI</i> (0.0726-0.0814) | 438<br>0.0745<br>(0.0647-0.0841)   | 330<br>0.08551<br>(0.0677-0.098)  | 0.1667               | --                   | --          | --          |
|                     | <i>Dpse-Daff</i> | <i>N</i> 1270<br><i>Ka/Ks</i> 0.07546<br><i>CI</i> (0.0708-0.0795) | 439<br>0.07262<br>(0.0662-0.0804)  | 331<br>0.08976<br>(0.0811-0.1027) | 0.0133*              | 0.0153*              | 0.0176*     | 0.7365      |
| Unbiased genes      | <i>Dmel-Dsec</i> | <i>N</i> 1769<br><i>Ka/Ks</i> 0.1032<br><i>CI</i> (0.0988-0.1084)  | 583<br>0.1098<br>(0.0985-0.1177)   | 420<br>0.1313<br>(0.1138-0.1459)  | 0.0005***            | 0.0003***            | 0.0070**    | 0.5611      |
|                     | <i>Dmel-Dyak</i> | <i>N</i> 1871<br><i>Ka/Ks</i> 0.09415<br><i>CI</i> (0.0898-0.0977) | 616<br>0.094335<br>(0.0857-0.1022) | 473<br>0.1064<br>(0.097-0.1149)   | 0.102                | --                   | --          | --          |
|                     | <i>Dpse-Dper</i> | <i>N</i> 1125<br><i>Ka/Ks</i> 0.09595<br><i>CI</i> (0.0891-0.1045) | 317<br>0.1249<br>(0.1036-0.1541)   | 265<br>0.1517<br>(0.1243-0.1843)  | 2.14e-05***          | 0.0001***            | 0.48        | 0.0041**    |
|                     | <i>Dpse-Dmir</i> | <i>N</i> 1090<br><i>Ka/Ks</i> 0.11815<br><i>CI</i> (0.1111-0.1267) | 372<br>0.1043<br>(0.0877-0.1196)   | 309<br>0.1358<br>(0.1207-0.1566)  | 0.0073**             | 0.0518               | 0.0064**    | 0.0709      |
|                     | <i>Dpse-Dlow</i> | <i>N</i> 745<br><i>Ka/Ks</i> 0.08777<br><i>CI</i> (0.0808-0.0959)  | 232<br>0.08791<br>(0.0776-0.108)   | 175<br>0.1021<br>(0.0835-0.1197)  | 0.3134               | --                   | --          | --          |
|                     | <i>Dpse-Daff</i> | <i>N</i> 747<br><i>Ka/Ks</i> 0.09078<br><i>CI</i> (0.0845-0.0968)  | 232<br>0.08599<br>(0.0694-0.0967)  | 175<br>0.09632<br>(0.077-0.1179)  | 0.1827               | --                   | --          | --          |

**Supplementary Table 4. Comparisons of dN/dS between X-linked and autosomal genes, divided by sex-biased expression.**

|                     |                  |                                       |                                    |                                   | Kruskal-Wallis tests              | Mann-Whitney U tests |             |             |        |
|---------------------|------------------|---------------------------------------|------------------------------------|-----------------------------------|-----------------------------------|----------------------|-------------|-------------|--------|
|                     |                  | A-A                                   | X-X                                | A-X                               |                                   | A-A vs. X-X          | A-X vs. X-X | A-X vs. A-A |        |
| Male-biased genes   | <i>Dmel-Dsec</i> | <i>N</i><br><i>dN/dS</i><br><i>CI</i> | 1562<br>0.102<br>(0.0947-0.1094)   | 418<br>0.0904<br>(0.0787-0.1017)  | 227<br>0.1055<br>(0.0865-0.1329)  | 0.0714               | --          | --          | --     |
|                     | <i>Dmel-Dyak</i> | <i>N</i><br><i>dN/dS</i><br><i>CI</i> | 1623<br>0.0913<br>(0.0854-0.0968)  | 433<br>0.0808<br>(0.0745-0.0936)  | 249<br>0.0971<br>(0.0829-0.1139)  | 0.1432               | --          | --          | --     |
|                     | <i>Dpse-Dper</i> | <i>N</i><br><i>dN/dS</i><br><i>CI</i> | 1184<br>0.12535<br>(0.1152-0.138)  | 234<br>0.15305<br>(0.131-0.1818)  | 158<br>0.17255<br>(0.125-0.2151)  | 0.0523               | --          | --          | --     |
|                     | <i>Dpse-Dmir</i> | <i>N</i><br><i>dN/dS</i><br><i>CI</i> | 865<br>0.1622<br>(0.1535-0.1803)   | 203<br>0.1653<br>(0.1442-0.2045)  | 135<br>0.1983<br>(0.1599-0.2547)  | 0.7818               | --          | --          | --     |
|                     | <i>Dpse-Dlow</i> | <i>N</i><br><i>dN/dS</i><br><i>CI</i> | 523<br>0.0998<br>(0.0914-0.1109)   | 114<br>0.1068<br>(0.0868-0.127)   | 75<br>0.1<br>(0.0766-0.1383)      | 0.8937               | --          | --          | --     |
|                     | <i>Dpse-Daff</i> | <i>N</i><br><i>dN/dS</i><br><i>CI</i> | 523<br>0.1139<br>(0.1017-0.124)    | 114<br>0.10985<br>(0.0908-0.1293) | 75<br>0.1091<br>(0.0832-0.1323)   | 0.9545               | --          | --          | --     |
| Female-biased genes | <i>Dmel-Dsec</i> | <i>N</i><br><i>dN/dS</i><br><i>CI</i> | 2263<br>0.0756<br>(0.0717-0.0801)  | 731<br>0.0782<br>(0.0711-0.0833)  | 632<br>0.0917<br>(0.0815-0.0993)  | 0.0030**             | 0.0030**    | 0.0078**    | 0.9409 |
|                     | <i>Dmel-Dyak</i> | <i>N</i><br><i>dN/dS</i><br><i>CI</i> | 2368<br>0.06405<br>(0.0611-0.0676) | 752<br>0.06505<br>(0.0603-0.0719) | 722<br>0.06975<br>(0.0642-0.0768) | 0.0667               | --          | --          | --     |
|                     | <i>Dpse-Dper</i> | <i>N</i><br><i>dN/dS</i><br><i>CI</i> | 1993<br>0.0802<br>(0.073-0.0881)   | 625<br>0.0909<br>(0.0798-0.1052)  | 523<br>0.1002<br>(0.0884-0.1129)  | 0.0124*              | 0.0098**    | 0.2359      | 0.2484 |
|                     | <i>Dpse-Dmir</i> | <i>N</i><br><i>dN/dS</i><br><i>CI</i> | 1432<br>0.0946<br>(0.088-0.1008)   | 515<br>0.1017<br>(0.0846-0.1124)  | 413<br>0.0939<br>(0.084-0.1098)   | 0.9881               | --          | --          | --     |
|                     | <i>Dpse-Dlow</i> | <i>N</i><br><i>dN/dS</i><br><i>CI</i> | 1243<br>0.0653<br>(0.0604-0.0693)  | 427<br>0.0613<br>(0.0498-0.0678)  | 324<br>0.0649<br>(0.0558-0.0789)  | 0.3678               | --          | --          | --     |
|                     | <i>Dpse-Daff</i> | <i>N</i><br><i>dN/dS</i><br><i>CI</i> | 1244<br>0.0632<br>(0.0602-0.067)   | 427<br>0.0585<br>(0.0525-0.0639)  | 324<br>0.0708<br>(0.0633-0.0839)  | 0.0729               | --          | --          | --     |
| Unbiased genes      | <i>Dmel-Dsec</i> | <i>N</i><br><i>dN/dS</i><br><i>CI</i> | 1751<br>0.0863<br>(0.0814-0.09)    | 578<br>0.09515<br>(0.0861-0.1027) | 417<br>0.1005<br>(0.0884-0.1133)  | 0.0230*              | 0.0240*     | 0.2005      | 0.2005 |
|                     | <i>Dmel-Dyak</i> | <i>N</i><br><i>dN/dS</i><br><i>CI</i> | 1850<br>0.0762<br>(0.071-0.0802)   | 609<br>0.0766<br>(0.0692-0.0872)  | 467<br>0.0772<br>(0.0702-0.0845)  | 0.7527               | --          | --          | --     |
|                     | <i>Dpse-Dper</i> | <i>N</i><br><i>dN/dS</i><br><i>CI</i> | 1271<br>0.0839<br>(0.0773-0.0905)  | 355<br>0.1046<br>(0.0842-0.125)   | 296<br>0.11985<br>(0.1003-0.1449) | 0.0140*              | 0.0175*     | 0.3914      | 0.1721 |
|                     | <i>Dpse-Dmir</i> | <i>N</i><br><i>dN/dS</i><br><i>CI</i> | 863<br>0.0926<br>(0.0842-0.1009)   | 309<br>0.0767<br>(0.0617-0.0948)  | 247<br>0.0951<br>(0.0794-0.1071)  | 0.1303               | --          | --          | --     |
|                     | <i>Dpse-Dlow</i> | <i>N</i><br><i>dN/dS</i><br><i>CI</i> | 739<br>0.0712<br>(0.0668-0.0762)   | 226<br>0.0697<br>(0.0595-0.0845)  | 171<br>0.0685<br>(0.0568-0.0853)  | 0.9225               | --          | --          | --     |
|                     | <i>Dpse-Daff</i> | <i>N</i><br><i>dN/dS</i><br><i>CI</i> | 739<br>0.069<br>(0.0635-0.0745)    | 226<br>0.0657<br>(0.0565-0.0733)  | 171<br>0.0711<br>(0.0539-0.0824)  | 0.5885               | --          | --          | --     |



**Supplementary Table S5.** To assess the quantitative effect of sex bias on the faster-X effect in both clades simultaneously, we took only the genes that could be aligned in all species ( $n = 2974$ ), and estimated a standardized rate of protein evolution,  $\omega$ , for each clade, using PAML's codeml (using the M0 codon model, with the transition-transversion rate estimated from the data and the codon frequencies estimated from the base frequencies, and using the tree with the best likelihood under the codon model for each gene). We then fit a linear model to the log-transformation of this  $\omega$  estimate, with the clade, X- or autosomal linkage, and the level of sex bias as factors. Sex bias is quantified as the log of the male to female expression ratio, with the source of the expression values as given in the main text. Note that the factors with negative coefficients are inferred to lower the rate of evolution in this model.

|                                  | coefficients | std error | t-value  | Pr(>  t )  |     |
|----------------------------------|--------------|-----------|----------|------------|-----|
|                                  | -3.24335     | 0.02921   | -111.052 | < 2.00E-16 | *** |
| Pseudo clade                     | 0.41061      | 0.04464   | 9.198    | < 2.00E-16 | *** |
| X-linkage                        | -0.03127     | 0.08538   | -0.366   | 0.7142     |     |
| sex bias                         | 0.16071      | 0.03635   | 4.422    | 9.97E-06   | *** |
| Pseudo clade: X-linkage          | -0.02884     | 0.10461   | -0.276   | 0.7828     |     |
| Pseudo clade:sex bias            | 0.57728      | 0.09223   | 6.259    | 4.15E-10   | *** |
| X-linkage:sex bias               | -0.27485     | 0.10489   | -2.62    | 0.0088     | **  |
| Pseudo clade: X-linkage:sex bias | -0.28443     | 0.18652   | -1.525   | 0.1273     |     |

Signif. codes: 0 '\*\*\*' 0.001 '\*\*' 0.01 '\*' 0.05 '.' 0.1 ' ' 1  
Residual standard error: 1.449 on 5940 degrees of freedom  
Multiple R-squared: 0.03052, Adjusted R-squared: 0.02938  
F-statistic: 26.71 on 7 and 5940 DF, p-value: < 2.20E-16



Supplementary Table S6. Polymorphism and divergence statistics for alleles from a Mesa Verda population of *D. pseudoobscura*.

| fbgn        | location | category      | n  | div_sitesR | div_sitesS | gaps | raw_divR | raw_divS | kR      | kS      | kR_JC   | kS_JC   | pm_sites_R | pm_sites_S | S_R | S_S | pi_R    | pi_S    | theta_R | theta_S | TD_R    | TD_S    |
|-------------|----------|---------------|----|------------|------------|------|----------|----------|---------|---------|---------|---------|------------|------------|-----|-----|---------|---------|---------|---------|---------|---------|
| FBgn0080425 | XR       | Unbiased      | 15 | 270.729    | 92.2708    | 99   | 5.26666  | 14.7333  | 0.01945 | 0.15967 | 0.01071 | 0.17954 | 270.777    | 92.2222    | 8   | 9   | 0.0059  | 0.01962 | 0.00908 | 0.03011 | -1.2877 | -1.2983 |
| FBgn0080442 | XR       | Unbiased      | 15 | 358.197    | 118.802    | 683  | 2        | 22.6     | 0.00558 | 0.19023 | 0.0056  | 0.21941 | 358.211    | 118.788    | 0   | 11  | 0       | 0.02228 | 0       | 0.02847 | -       | -0.8378 |
| FBgn0080491 | XR       | Unbiased      | 15 | 216.52     | 74.4791    | 200  | 0        | 15.0666  | 0       | 0.20229 | 0       | 0.23574 | 216.5      | 74.5       | 0   | 1   | 0       | 0.00178 | 0       | 0.00412 | -       | -1.1594 |
| FBgn0080502 | XR       | Unbiased      | 15 | 381.666    | 113.333    | 264  | 7        | 24.3333  | 0.01834 | 0.2147  | 0.01856 | 0.25294 | 393.666    | 116.333    | 1   | 2   | 0.00033 | 0.00507 | 0.00078 | 0.00528 | -1.1594 | -0.1052 |
| FBgn0080686 | XR       | Unbiased      | 15 | 276.062    | 89.9375    | 356  | 12.3333  | 33       | 0.04467 | 0.36692 | 0.04606 | 0.50387 | 289.055    | 94.9444    | 12  | 36  | 0.01159 | 0.10071 | 0.01276 | 0.11661 | -0.3569 | -0.5792 |
| FBgn0080703 | XR       | Unbiased      | 12 | 257.5      | 81.5       | 43   | 3        | 23.3333  | 0.01165 | 0.28629 | 0.01174 | 0.36062 | 257.5      | 81.5       | 0   | 4   | 0       | 0.00985 | 0       | 0.01625 | -       | -1.3847 |
| FBgn0080821 | XR       | Unbiased      | 15 | 365.197    | 120.802    | 1073 | 0        | 13.2     | 0       | 0.10926 | 0       | 0.11809 | 365.088    | 120.911    | 0   | 6   | 0       | 0.00756 | 0       | 0.01526 | -       | -1.7662 |
| FBgn0080923 | XR       | Unbiased      | 15 | 313.52     | 97.4791    | 439  | 0        | 19.5333  | 0       | 0.20038 | 0       | 0.23314 | 313.444    | 97.5555    | 0   | 11  | 0       | 0.03241 | 0       | 0.03467 | -       | -0.2518 |
| FBgn0080991 | XR       | Unbiased      | 15 | 386.187    | 123.812    | 645  | 0        | 26.1333  | 0       | 0.21107 | 0       | 0.24786 | 386.166    | 123.833    | 0   | 2   | 0       | 0.00215 | 0       | 0.00496 | -       | -1.4905 |
| FBgn0081203 | XR       | Unbiased      | 13 | 216.404    | 80.5952    | 892  | 0.07692  | 10       | 0.00035 | 0.12407 | 0.00035 | 0.13563 | 222.358    | 83.641     | 2   | 6   | 0.00196 | 0.0141  | 0.00289 | 0.02311 | -0.9092 | -1.44   |
| FBgn0081662 | XR       | Unbiased      | 15 | 392.062    | 114.937    | 255  | 4.26666  | 20       | 0.01088 | 0.174   | 0.01096 | 0.19798 | 411.1      | 119.9      | 3   | 11  | 0.00148 | 0.02446 | 0.00224 | 0.02821 | -1.0094 | -0.5123 |
| FBgn0081676 | A        | Unbiased      | 14 | 64.7333    | 19.2666    | 181  | 5.71428  | 3.64285  | 0.08827 | 0.18907 | 0.09391 | 0.21786 | 64.7142    | 19.2857    | 2   | 4   | 0.00781 | 0.04957 | 0.00971 | 0.06521 | -0.5324 | -0.7903 |
| FBgn0081984 | XR       | Unbiased      | 11 | 289.916    | 103.083    | 572  | 5        | 15.5454  | 0.01724 | 0.1508  | 0.01744 | 0.16836 | 289.924    | 103.075    | 0   | 5   | 0       | 0.01023 | 0       | 0.01656 | -       | -1.4646 |
| FBgn0082012 | A        | Unbiased      | 11 | 83.1666    | 33.8333    | 439  | 0        | 2.0909   | 0       | 0.1618  | 0       | 0.06449 | 83.1666    | 33.8333    | 0   | 1   | 0       | 0.00537 | 0       | 0.01009 | -       | -1.1285 |
| FBgn0082034 | A        | Female-biased | 15 | 144.833    | 44.1666    | 1082 | 4.06666  | 6.13333  | 0.02807 | 0.13886 | 0.02861 | 0.15356 | 144.766    | 44.2333    | 1   | 2   | 0.00092 | 0.00602 | 0.00212 | 0.0139  | -1.1594 | -1.4905 |
| FBgn0082078 | A        | Unbiased      | 14 | 381.188    | 131.811    | 221  | 43.6428  | 51.8571  | 0.14449 | 0.39342 | 0.12423 | 0.55763 | 380.809    | 132.19     | 7   | 23  | 0.00429 | 0.03674 | 0.00578 | 0.05471 | -0.9451 | -1.3867 |
| FBgn0082108 | A        | Female-biased | 15 | 420.562    | 131.437    | 755  | 57.8666  | 39       | 0.13759 | 0.29671 | 0.152   | 0.37766 | 420.522    | 131.477    | 13  | 6   | 0.00543 | 0.01216 | 0.0095  | 0.01403 | -1.6841 | -0.4653 |
| FBgn0244147 | XL       | Unbiased      | 15 | 396.885    | 116.114    | 286  | 46.6     | 31.4     | 0.11741 | 0.27042 | 0.12769 | 0.33537 | 403.522    | 118.477    | 10  | 9   | 0.00457 | 0.01543 | 0.00762 | 0.02336 | -1.5195 | -1.2725 |
| FBgn0244218 | XL       | Unbiased      | 15 | 412.583    | 127.416    | 138  | 27.8666  | 34.2     | 0.06754 | 0.26841 | 0.07077 | 0.33223 | 412.555    | 127.444    | 4   | 2   | 0.0018  | 0.00209 | 0.00298 | 0.00482 | -1.2699 | -1.4905 |
| FBgn0244765 | XR       | Female-biased | 15 | 183.27     | 50.7291    | 195  | 4.13333  | 16.1333  | 0.02255 | 0.31802 | 0.02289 | 0.41378 | 183.288    | 50.7111    | 1   | 13  | 0.00135 | 0.06084 | 0.00167 | 0.07884 | -0.3988 | -0.8973 |
| FBgn0244843 | XR       | Unbiased      | 15 | 189.552    | 65.4479    | 809  | 0        | 14.3333  | 0       | 0.219   | 0       | 0.25898 | 189.477    | 65.5222    | 0   | 4   | 0       | 0.00988 | 0       | 0.01877 | -       | -1.5181 |
| FBgn0244862 | XR       | Female-biased | 14 | 355.344    | 109.655    | 783  | 64.4285  | 17.5714  | 0.18131 | 0.16024 | 0.20755 | 0.18027 | 393.892    | 122.107    | 28  | 4   | 0.01855 | 0.00557 | 0.02235 | 0.0103  | -0.7267 | -1.5097 |
| FBgn0244919 | XR       | Female-biased | 15 | 256.583    | 67.4166    | 646  | 13       | 8.73333  | 0.05066 | 0.12954 | 0.05245 | 0.14221 | 268        | 71         | 0   | 8   | 0       | 0.02441 | 0       | 0.03465 | -       | -1.0881 |
| FBgn0245136 | XR       | Unbiased      | 15 | 299.406    | 105.593    | 136  | 4.2      | 21.3333  | 0.01402 | 0.20203 | 0.01416 | 0.23539 | 299.355    | 105.644    | 2   | 7   | 0.00127 | 0.01099 | 0.00205 | 0.02037 | -1.0016 | -1.6576 |
| FBgn0245216 | XR       | Unbiased      | 15 | 302.697    | 96.302     | 324  | 1        | 21.6666  | 0.0033  | 0.22498 | 0.00331 | 0.26748 | 302.666    | 96.3333    | 0   | 6   | 0       | 0.01265 | 0       | 0.01915 | -       | -1.188  |
| FBgn0246788 | A        | Unbiased      | 9  | 467.816    | 147.183    | 339  | 38       | 60       | 0.08122 | 0.40765 | 0.08597 | 0.58818 | 467.833    | 147.166    | 0   | 0   | 0       | 0       | 0       | 0       | -       | -       |
| FBgn0246854 | A        | Unbiased      | 15 | 203.218    | 60.7812    | 339  | 4.8      | 18.3333  | 0.02361 | 0.30162 | 0.02399 | 0.38583 | 203.2      | 60.8       | 6   | 13  | 0.00712 | 0.04401 | 0.00908 | 0.06575 | -0.7544 | -1.3    |
| FBgn0247266 | A        | Unbiased      | 7  | 398.937    | 126.062    | 648  | 38.5714  | 34.4285  | 0.09668 | 0.2731  | 0.10351 | 0.33958 | 402.595    | 128.404    | 10  | 5   | 0.00756 | 0.01557 | 0.01013 | 0.01589 | -1.3593 | -0.999  |
| FBgn0247718 | A        | Unbiased      | 15 | 368.041    | 123.958    | 335  | 26.6666  | 30.4     | 0.07245 | 0.24524 | 0.07619 | 0.29699 | 368.2      | 123.8      | 6   | 15  | 0.00341 | 0.02907 | 0.00501 | 0.03726 | -1.1157 | -0.8767 |
| FBgn0247974 | A        | Female-biased | 14 | 361.077    | 100.922    | 1069 | 32.2857  | 26.4285  | 0.08941 | 0.26187 | 0.09521 | 0.32211 | 361.047    | 100.952    | 6   | 8   | 0.0027  | 0.01665 | 0.00522 | 0.02491 | -1.7289 | -1.2506 |
| FBgn0248238 | A        | Unbiased      | 13 | 347.952    | 99.0476    | 245  | 13.1538  | 22.6153  | 0.0378  | 0.22832 | 0.03878 | 0.27227 | 376.128    | 109.871    | 2   | 5   | 0.00081 | 0.0098  | 0.00171 | 0.01466 | -1.468  | -1.1822 |
| FBgn0248273 | A        | Female-biased | 15 | 401.875    | 120.125    | 108  | 7        | 39.5333  | 0.01741 | 0.3291  | 0.01762 | 0.43325 | 401.833    | 120.166    | 0   | 6   | 0       | 0.00951 | 0       | 0.01535 | -       | -1.3325 |
| FBgn0249640 | XR       | Unbiased      | 15 | 156.291    | 44.7083    | 669  | 0        | 11.0666  | 0       | 0.24753 | 0       | 0.3004  | 156.333    | 44.6666    | 0   | 1   | 0       | 0.00298 | 0       | 0.00688 | -       | -1.1594 |
| FBgn0249878 | XR       | Female-biased | 15 | 371.979    | 108.02     | 925  | 29.1333  | 29.2666  | 0.07831 | 0.27093 | 0.08271 | 0.33617 | 387.855    | 113.144    | 3   | 3   | 0.00103 | 0.0074  | 0.00237 | 0.00815 | -1.685  | -0.2725 |
| FBgn0261117 | A        | Female-biased | 15 | 361.927    | 82.0729    | 1926 | 27.9333  | 19.5333  | 0.07717 | 0.23799 | 0.08144 | 0.28631 | 363.833    | 83.1666    | 1   | 2   | 0.00036 | 0.01007 | 0.00084 | 0.00739 | -1.1594 | 0.95399 |

**Supplementary Table S7. Correlates of diversity and divergence**

| Variables      | Covariates   | Partial correlations<br>(lower and upper one percentiles in brackets) |                       |                       |                        |
|----------------|--------------|-----------------------------------------------------------------------|-----------------------|-----------------------|------------------------|
|                |              | Fast-evolving                                                         |                       | Female-biased         |                        |
|                |              | XR                                                                    | A                     | X                     | A                      |
| $\pi_S, K_S$   | $K_A, Fop$   | 0.005 (-0.305/0.246)                                                  | 0.170 (-0.346/0.622)  | 0.401(-1.000/1.000)   | -0.092 (-0.783/0.498)  |
| $\pi_S, Fop$   | $K_A, K_S$   | 0.099 (-0.307/0.401)                                                  | 0.371* (-0.053/0.680) | 0.370 (-1.000/1.000)  | 0.392* (-0.210/0.819)  |
| $\pi_S, K_A$   | $K_S, Fop$   | 0.094 (-0.285/0.426)                                                  | 0.046 (-0.365/0.554)  | -0.483(-1.000/1.000)  | 0.062 (-0.587/0.746)   |
| $K_A, K_S$     | $\pi_S, Fop$ | 0.296** (0.027/0.540)                                                 | 0.417** (0.079/0.759) | 0.057 (-1.000/1.000)  | 0.672** (0.189/0.905)  |
| $Fop, K_S$     | $\pi_S, K_A$ | -0.080 (-0.353/0.232)                                                 | -0.132 (-0.614/0.759) | -0.322 (-1.000/1.000) | -0.087 (-0.665/0.589)  |
| $\pi_A, K_S$   | $K_A, Fop$   | -0.024 (-0.218/0.781)                                                 | 0.179 (-0.365/0.728)  | -0.273 (-1.000/1.000) | -0.269 (-0.761/0.531)  |
| $\pi_A, Fop$   | $K_A, K_S$   | 0.093 (-0.198/0.381)                                                  | 0.176 (-0.353/0.523)  | 0.326 (-1.000/1.000)  | 0.153 (-0.368/0.776)   |
| $\pi_A, K_A$   | $K_S, Fop$   | 0.517** (0.179/0.781)                                                 | 0.351* (-0.033/0.726) | 0.848 (-1.000/1.000)  | 0.372 (-0.023/0.777)   |
| $K_A, K_S$     | $\pi_A, Fop$ | 0.267** (0.003/0.530)                                                 | 0.335* (-0.095/0.751) | 0.145 (-1.000/1.000)  | 0.699** (0.001/0.902)  |
| $\pi_A, K_A$   | $Fop, Exp$   | 0.536** (0.201/0.782)                                                 | 0.455** (0.040/0.688) | 0.799 (-1.000/1.000)  | 0.183 (-0.164/0.702)   |
| $\pi_S, \pi_A$ | $K_A, K_S$   | 0.520** (0.204/0.663)                                                 | 0.727** (0.301/0.877) | -0.278 (-1.000/1.000) | 0.414*** (0.069/0.887) |

\*  $p < 0.05$  (one-tailed test)

\*\*  $p < 0.01$  (one-tailed test)
